# Supplementary material for: Nitric oxide generated by nitrate reductase increases nitrogen uptake capacity by inducing lateral root formation and inorganic nitrogen uptake under partial nitrate nutrition in rice
Source: PubMed Central journal article supplement (PMC4986861; doi:10.1093/jxb/erv030), 2015-03-17
Supplement: supp_erv030_jexbot137000_file001.pdf [file supp_erv030_jexbot137000_file001.pdf]

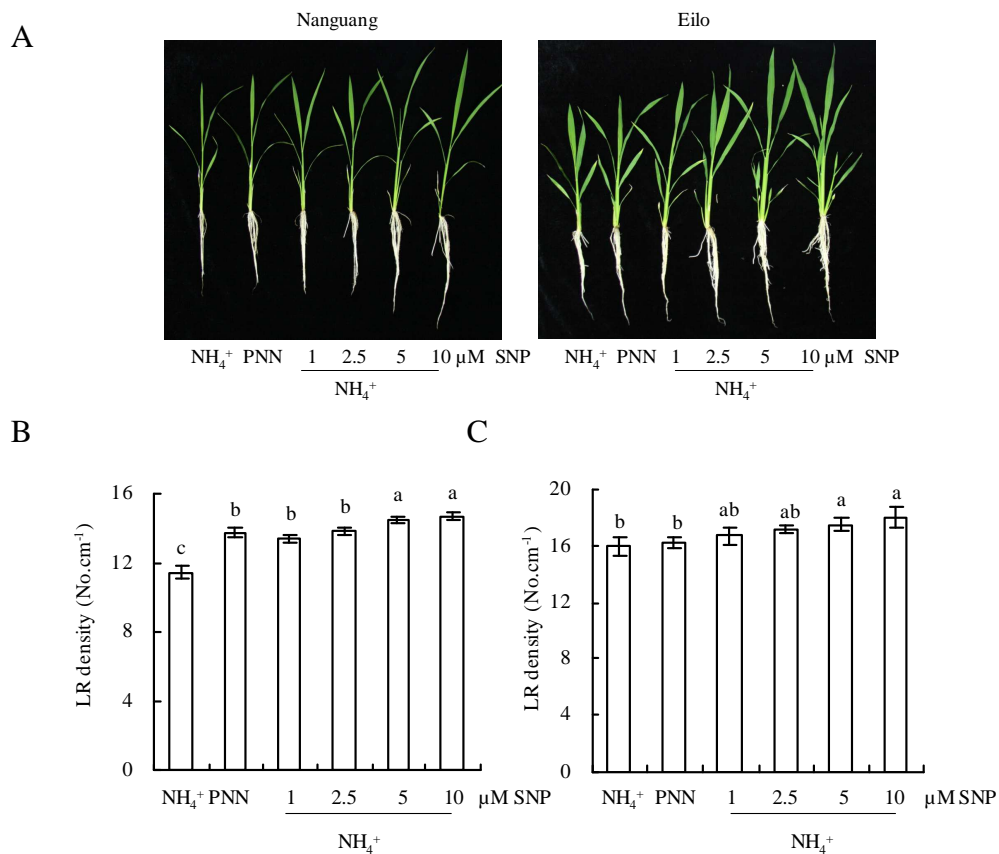

**Fig. S1** Effect of NO donor SNP on LR density of seminal root in cvs. Nanguang (B) and Eilo (C). (A) Appearance of seedlings treated with NH<sub>4</sub><sup>+</sup>, partial nitrate nutrition (PNN) and NH<sub>4</sub><sup>+</sup>+SNP. Seedlings were grown in nutrient solution that contained NH<sub>4</sub><sup>+</sup>-only and PNN with or without NO donor SNP for 14 days. Data are means ± SE and bars with different letters indicate significant differences at P < 0.05, as determined by ANOVA.

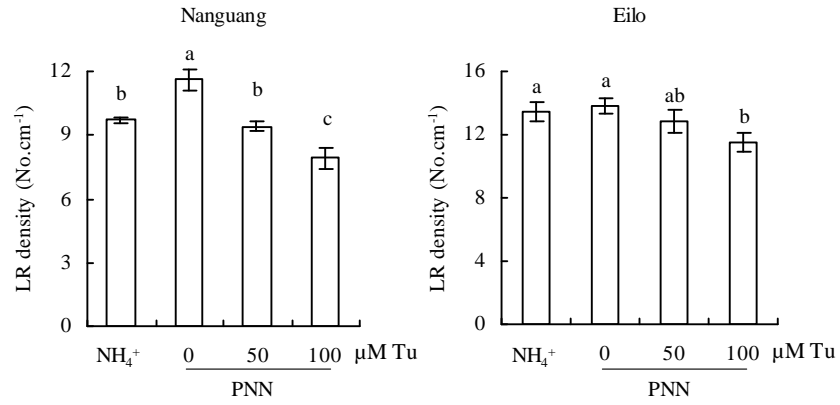

**Fig. S2** Effect of NR inhibitor tungstate (Tu) on LR density of seminal root in cvs Nanguang and Elio. Seedlings were grown in nutrient solution that contained NH<sub>4</sub><sup>+</sup>-only and PNN with NR inhibitor tungstate varying from 0 to 100μM for 14 days. Data are means ± SE and bars with different letters indicate significant differences at P < 0.05, as determined by ANOVA.

**Table S1** The primers for qRT-PCR of *OsNOA*, *OsNIA1*, *OsNIA2* genes and *OsActin*.

| Gene          | Accession number | Primer sequence             |
|---------------|------------------|-----------------------------|
| <i>OsNOA</i>  | Os02g0104700     | 5'-TGCTTCTGTGGTTGGGAC-3'    |
|               |                  | 5'-TCTAAGGGCACGGTGTTT-3'    |
| <i>OsNIA1</i> | AK102178         | 5'-CCAATTCTTTCATCGTGTCT-3'  |
|               |                  | 5'-CATGCAGCATTTCGTTTCT-3'   |
| <i>OsNIA2</i> | AK102363         | 5'-ACTGGTGCTGGTGCTTCTGG-3'  |
|               |                  | 5'-CGGCTGGGTGTTGAGGGACT-3'  |
| <i>OsACT</i>  | LOC_Os03g50890   | 5'-CAACACCCCTGCTATGTACG-3'  |
|               |                  | 5'-CATCACCAGAGTCCAACACAA-3' |

**Table S2** The primers for qRT-PCR of *OsAMT1-3*, *OsNRT2* and *OsNAR2* genes.

| Gene             | Accession number | Primer sequence                 |
|------------------|------------------|---------------------------------|
| <i>OsAMT1.1</i>  | LOC_Os04g43070   | 5'-AGCGAAGGAAGAAATCACG-3'       |
|                  |                  | 5'-CCAAACAGAAACTGGCAATC-3'      |
| <i>OsAMT1.2</i>  | LOC_Os02g40710   | 5'-TTCTACGTGCTGCACAGGTTC-3'     |
|                  |                  | 5'-TTGCTCCGGCGACTTTTCT-3'       |
| <i>OsAMT1.3</i>  | LOC_Os02g40730   | 5'-GTCTAGTGGAAACCGGAGGAG-3'     |
|                  |                  | 5'-CCTATTATAACAATCACGAAACCTG-3' |
| <i>OsAMT2.1</i>  | LOC_Os05g39240   | 5'-CTGGCTCCTCCTCTCCTACA-3'      |
|                  |                  | 5'-CAGGATGTTGTTCCGGTGAGA-3'     |
| <i>OsAMT2.2</i>  | LOC_Os01g61510   | 5'-GCCTCGACGTCATCTTCTTC-3'      |
|                  |                  | 5'-TTGTGGAGGATCATCATGGA-3'      |
| <i>OsAMT2.3</i>  | LOC_Os01g61550   | 5'-GCCTCGACGTCATCTTCTTC-3'      |
|                  |                  | 5'-GGAAGGTGGATTTCTTGTGC-3'      |
| <i>OsAMT3.1</i>  | LOC_Os01g65000   | 5'-CTCCCGCAGACGACGCAGTT-3'      |
|                  |                  | 5'-GCCGACGGTGTAGGAGAAGGTG-3'    |
| <i>OsAMT3.2</i>  | LOC_Os03g62200   | 5'-CTCACCTTCTCCTACACCGTC-3'     |
|                  |                  | 5'-ACCCCATCCATAGTAACCCTG-3'     |
| <i>OsAMT3.3</i>  | LOC_Os02g34580   | 5'-GCTGGCGCACTATTTGTCA-3'       |
|                  |                  | 5'-CATTCTGTGTCACTCCTACA-3'      |
| <i>OsNRT2.1</i>  | LOC_Os02g02170   | 5'-CTTGTTGCAAACGGTGATGA-3'      |
|                  |                  | 5'-GCCTCTCCCTTATTATACCTCCG-3'   |
| <i>OsNRT2.2</i>  | LOC_Os02g02190   | 5'-CGGAGCACGCCTAATTAAGAG-3'     |
|                  |                  | 5'-CTCCATGACGACATACTCTAGATA-3'  |
| <i>OsNRT2.3a</i> | LOC_Os01g50820   | 5'-CGCTGCTGCCGCTCATCCG-3'       |
|                  |                  | 5'-CCGTGCCCATGGCCAGAC-3'        |
| <i>OsNRT2.4</i>  | LOC_Os01g36720   | 5'-AAAGGTCGCTGGGCGTGGTG-3'      |
|                  |                  | 5'-CCTGGACCCGCTGAAGAAGAG-3'     |
| <i>OsNAR2.1</i>  | LOC_Os02g38230   | 5'-CAAGGACAAGGCGTGCCAG-3'       |
|                  |                  | 5'-GCGATGGAGAAGGTGGAG-3'        |
| <i>OsNAR2.2</i>  | LOC_Os04g40410   | 5'-GACGACCTGAGCAAGGACAAG-3'     |
|                  |                  | 5'-TGCCACCGTGTACTCGAACTT-3'     |
